# Supplementary material for: The Importance of the Dissociation Rate in Ion Channel Blocking
Source: PubMed Central journal article supplement (PMC5811512; doi:10.3389/fncel.2018.00033), 2018-02-09
Supplement: Appendix.pdf [file Appendix.pdf]

## APPENDIX

### The Importance of the Dissociation Rate in Ion Channel Blocking

Front. Cell. Neurosci. 12:33. doi: 10.3389/fncel.2018.00033

Hugo Zeberg<sup>1,\*</sup>, Johanna Nilsson<sup>1,2</sup> and Peter Århem<sup>1</sup>

*Department of Neuroscience, Karolinska Institutet, 171 77 Stockholm, Sweden*

*Department of Clinical Neuroscience, Karolinska Institutet, 171 76 Stockholm, Sweden*

\*hugo.zeberg@ki.se

### Condition for a Peak in the General Case with a $n \times n$ Matrix

By the Putzer algorithm, the solution to  $\mathbf{x}' = \mathbf{A}\mathbf{x}$  can be written as

$$\mathbf{x}(t) = (p_1(t)\mathbf{M}_1 + p_2(t)\mathbf{M}_2 + \dots + p_n(t)\mathbf{M}_n)\mathbf{x}_0 \quad (\text{A1})$$

where  $p_i$  and  $\mathbf{M}_i$  are defined as follows. Define  $n \times n$  matrices  $\mathbf{M}_1, \dots, \mathbf{M}_n$  by the formulae

$$\mathbf{M}_1 = I \quad \mathbf{M}_i = (\mathbf{A} - r_{i-1}I)\mathbf{M}_{i-1} \quad i = 2, \dots, n \quad (\text{A2})$$

and let the functions  $p_1, \dots, p_n$  be given by solutions to the differential system

$$\begin{aligned} p_1' &= r_1 p_1 & p_1(0) &= 1 \\ p_2' &= r_2 p_2 - p_1 & p_2(0) &= 0 \\ &\vdots & & \\ p_n' &= r_n p_n - p_{n-1} & p_n(0) &= 0 \end{aligned} \quad (\text{A3})$$

where  $r_i$  are eigenvalues in any arbitrary order to the matrix  $\mathbf{A}$ . We will begin by proving that

$$p_i(t) = \sum_{j=1}^{j=i} \left( \prod_{\substack{k=1 \\ k \neq j}}^{k=i} (r_j - r_k) \right)^{-1} e^{r_j t}. \quad (\text{A4})$$

It is straight forward to verify that this is a solution to the equation system above.

$$\begin{aligned} p_i'(t) - r_i p_i(t) &= \sum_{j=1}^{j=i} r_j \left( \prod_{\substack{k=1 \\ k \neq j}}^{k=i} (r_j - r_k) \right)^{-1} e^{r_j t} - \sum_{j=1}^{j=i} r_i \left( \prod_{\substack{k=1 \\ k \neq j}}^{k=i} (r_j - r_k) \right)^{-1} e^{r_j t} \\ &= \sum_{j=1}^{j=i} (r_j - r_i) \left( \prod_{\substack{k=1 \\ k \neq j}}^{k=i} (r_j - r_k) \right)^{-1} e^{r_j t} \\ &= \sum_{j=1}^{j=i-1} \left( \prod_{\substack{k=1 \\ k \neq j}}^{k=i-1} (r_j - r_k) \right)^{-1} e^{r_j t} \\ &= p_{i-1} \end{aligned} \quad (\text{A5})$$

It is also necessary to verify that  $p_i(0) = 0$  for  $i > 1$ . We will show this using induction. By change of variable,  $s_j = r_j - r_i$ , we can show that if  $p_{i-1}(0) = 0$  then so is  $p_i(0)$

$$\begin{aligned}
p_i'(0) - r_i p_i(0) &= 0 & (A6) \\
\sum_{j=1}^{j=i} r_j \left( \prod_{\substack{k=1 \\ k \neq j}}^{k=i} (r_j - r_k) \right)^{-1} - r_i p_i(0) &= 0 \\
\sum_{j=1}^{j=i} (s_j + r_i) \left( \prod_{\substack{k=1 \\ k \neq j}}^{k=i} (s_j - s_k) \right)^{-1} - r_i p_i(0) &= 0 \\
\sum_{j=1}^{j=i} (s_j + r_i) \left( s_j \prod_{\substack{k=1 \\ k \neq j}}^{k=i-1} (s_j - s_k) \right)^{-1} - r_i p_i(0) &= 0 \\
(1 + r_i) p_{i-1}(0) - r_i p_i(0) &= 0 \\
p_i(0) &= 0,
\end{aligned}$$

completing the proof of the analytic expression for  $p_i(t)$ . Note that for  $i = 2$  the third step is not permissible, but  $p_2(0)$  is trivially zero and can serve as the basis for the induction. We now turn to the matrix differential equation of interest. An  $n$ -state scheme with  $n-2$  closed states written in matrix form  $\mathbf{x}' = \mathbf{A}\mathbf{x}$  where

$$\mathbf{x} = \begin{bmatrix} C_1(t) \\ C_2(t) \\ \vdots \\ C_{n-2}(t) \\ O(t) \\ B(t) \end{bmatrix} \quad \mathbf{A} = \begin{bmatrix} -(n-2)\alpha & \beta & 0 & 0 & \cdots & 0 \\ (n-2)\alpha & -(n-3)\alpha - \beta & 2\beta & \ddots & \ddots & \vdots \\ 0 & (n-3)\alpha & \ddots & \ddots & \ddots & 0 \\ 0 & \ddots & \ddots & \ddots & (n-2)\beta & 0 \\ \vdots & \ddots & \ddots & \alpha & -(n-2)\beta - \gamma & \delta \\ 0 & \cdots & 0 & 0 & \gamma & -\delta \end{bmatrix} \quad (A7)$$

with the general solution

$$\mathbf{x}(t) = c_1 \mathbf{V}_1 e^{r_1 t} + c_2 \mathbf{V}_2 e^{r_2 t} \dots + c_n \mathbf{V}_n e^{r_n t} \quad (A8)$$

where  $c_i$  are constant depending on the initial condition and  $\mathbf{V}_i$  are the corresponding eigenvectors to  $\mathbf{A}$ . Let  $\mathbf{x}(0) = [1 \ 0 \ \dots]^T$  (i.e. the channels have an initial probability of one in being in the first closed state). Using Putzers algorithm and the result for  $p_i(t)$  we can write

$$c_n \mathbf{V}_n e^{r_n t} = \left( \prod_{k=1}^{k=n-1} (r_n - r_k) \right)^{-1} \mathbf{M}_n \mathbf{x}(0) e^{r_n t} \quad (A9)$$

Note that  $r_n$  only exists in  $p_n(t)$  and that we can extract the last term in the sum giving the analytical expression for  $p_n(t)$ .

To get the pre-exponential factor  $c_n \mathbf{V}_n$  we need to solve  $\mathbf{M}_n \mathbf{x}(0)$ ,

$$\begin{aligned} \mathbf{M}_n \mathbf{x}(0) &= (\mathbf{A} - r_1 \mathbf{I})(\mathbf{A} - r_2 \mathbf{I}) \dots (\mathbf{A} - r_{n-1} \mathbf{I}) \mathbf{x}(0) \\ &= \mathbf{A}^{n-2} (\mathbf{A} - r_1 \mathbf{I} - r_2 \mathbf{I} \dots - r_{n-1} \mathbf{I}) \mathbf{x}(0) + \mathbf{U} \\ &= \mathbf{A}^{n-2} \begin{pmatrix} a_{1,1} - r_1 - r_2 - \dots - r_{n-1} \\ a_{2,1} \\ 0 \\ \vdots \\ 0 \end{pmatrix} + \mathbf{U} \end{aligned} \quad (\text{A10})$$

where  $a_{i,j}$  are elements of the matrix  $\mathbf{A}$ ,  $\mathbf{I}$  the identity matrix, and  $\mathbf{U}$  is some vector with a zero on the next last row (due to the tridiagonal nature of the matrix  $\mathbf{A}$ , the number of non-zero diagonals increase with two for each multiplication why we can omit terms involving lower powers than  $n - 2$ ). Given that we are solving for  $O(t)$  we are only interested in the next last element of the resulting vector. Moreover, due to the zeros of the column vector containing the eigenvalues it suffices to obtain  $(\mathbf{A}^{n-2})_{n-1,1}$  and  $(\mathbf{A}^{n-2})_{n-1,2}$ . We begin with the leftmost element, viz.

$$\begin{aligned} (\mathbf{A}^{n-2})_{n-1,1} &= (\mathbf{A})_{n-1,:} (\mathbf{A}^{n-3})_{:,1} \\ &= (\mathbf{A})_{n-1,:} (a_{2,1} (\mathbf{A}^{n-4})_{:,2}) = (\mathbf{A})_{n-1,:} (a_{2,1} a_{3,2} (\mathbf{A}^{n-5})_{:,3}) = \dots \\ &= \prod_{i=1}^{i=n-2} a_{i+1,i} \end{aligned} \quad (\text{A11})$$

Again, we can omit terms due to the sparse nature of  $\mathbf{A}$ . We are now left with obtaining an analytic expression for  $(\mathbf{A}^{n-2})_{n-1,2}$ .

$$\begin{aligned} (\mathbf{A}^{n-2})_{n-1,2} &= (\mathbf{A})_{n-1,:} (\mathbf{A}^{n-3})_{:,2} \\ &= (\mathbf{A})_{n-1,:} (a_{2,2} (\mathbf{A}^{n-4})_{:,2} + a_{3,2} (\mathbf{A}^{n-4})_{:,3}) \\ &= (\mathbf{A})_{n-1,:} (a_{2,2} a_{3,2} (\mathbf{A}^{n-5})_{:,3} + a_{3,2} (a_{3,3} (\mathbf{A}^{n-5})_{:,3} + a_{4,3} (\mathbf{A}^{n-5})_{:,4})) \\ &= \left( \prod_{i=2}^{i=n-2} a_{i+1,i} \right) \left( \sum_{i=2}^{i=n-1} k_{i,i} \right) \end{aligned} \quad (\text{A12})$$

Now using the fact that the sum of eigenvalues equals the trace we multiply  $(\mathbf{A}^{n-2})_{n-1,1}$  and  $(\mathbf{A}^{n-2})_{n-1,2}$  with the respective value in the column vector in eqn. A10 yielding

$$\begin{aligned} &\left( \prod_{i=1}^{i=n-2} a_{i+1,i} \right) (a_{1,1} - \text{Tr}(\mathbf{A}) + r_n) + \left( \prod_{i=2}^{i=n-2} a_{i+1,i} \right) (\text{Tr}(\mathbf{A}) - a_{1,1} - a_{n,n}) a_{2,1} \\ &= \left( \prod_{i=1}^{i=n-2} a_{i+1,i} \right) (r_n - a_{n,n}) \\ &= (n-2)! \alpha^{n-2} (\delta + r_n) \end{aligned} \quad (\text{A13})$$

Combining with our result for  $p_n(t)$  and we obtain

$$(n-2)! \alpha^{n-2} (\delta + r_n) \left( \prod_{k=1}^{k=n-1} (r_n - r_k) \right)^{-1} e^{r_n t} \quad (\text{A14})$$

Assume without loss of generality that  $r_n$  is the slowest decaying term.  $(r_n - r_k)$  will be strictly positive except for the eigenvalue which is zero. Thus,

$$\left( \prod_{k=1}^{k=n-1} (r_n - r_k) \right)^{-1} < 0 \quad (\text{A15})$$

By the fact that the rate constants are positive we have  $(n-2)! \alpha^{n-2} > 0$ . Hence, the pre-exponential factor is positive if, and only if,

$$\delta + r_n < 0. \quad (\text{A16})$$

By elimination of the eigenvalues from Vieta's formulae it follows that  $(r_n + \delta) < 0$  is a root to

$$\sum_{i=1}^{i=n} (-1)^n \frac{b_i}{b_n} \delta^i < 0 \quad (\text{A17})$$

where  $b_i$  are the coefficients to the characteristic polynomial to  $\mathbf{A}$ . By the Picard–Lindelöf theorem, the solution to  $\mathbf{x}' = \mathbf{A}\mathbf{x}$  is unique. Thus, since we are free to choose the eigenvalues in any given order, our result for the pre-exponential factor to  $e^{r_n t}$  must be true for any  $e^{r_i t}$  why  $O(t)$  can be written on a surprisingly compact form, namely

$$O(t) = \sum_{i=1}^{i=n} \frac{(n-2)! \alpha^{n-2} (r_i + \delta)}{\prod_{i \neq j} (r_i - r_j)} e^{r_i t} \quad (\text{A18})$$

It transpires that the associated rate  $\gamma$  does not affect the prerequisites for a peak. Let  $\delta = -r_n$ , which gives

$$\begin{aligned} \det(A - r_n I) &= \det(A + \delta I) \\ &= \det \begin{pmatrix} -(n-2)\alpha + \delta & \beta & 0 & 0 & \dots & 0 \\ (n-2)\alpha & -(n-3)\alpha - \beta + \delta & 2\beta & \ddots & \ddots & \vdots \\ 0 & (n-3)\alpha & \ddots & \ddots & \ddots & 0 \\ 0 & \ddots & \ddots & \ddots & (n-2)\beta & 0 \\ \vdots & \ddots & \ddots & \alpha & -(n-2)\beta - \gamma + \delta & \delta \\ 0 & \dots & 0 & 0 & \gamma & 0 \end{pmatrix} \\ &= 0 \end{aligned} \quad (\text{A19})$$

The determinant can now be expanded in terms of minors along the last row, yielding

$$\gamma \det \begin{pmatrix} -(n-2)\alpha + \delta & \beta & 0 & 0 & 0 \\ (n-2)\alpha & -(n-3)\alpha - \beta + \delta & 2\beta & \ddots & \vdots \\ 0 & (n-3)\alpha & \ddots & \ddots & 0 \\ 0 & \ddots & \ddots & \ddots & 0 \\ \vdots & \ddots & \ddots & \alpha & \delta \end{pmatrix} = 0 \quad (\text{A20})$$

$\gamma$  can in this equation be factored out, showing that  $\gamma$  does not influence the existence of a peak as long as  $\gamma > 0$ .
